# Supplementary material for: Assessing Potential Exemplars in Reducing Zero-Dose Children: A Novel Approach for Identifying Positive Outliers in Decreasing National Levels and Geographic Inequalities in Unvaccinated Children
Source: MDPI journal article supplement (doi:10.3390/vaccines11030647), 2023-03-14

## Supplementary Material

**Title: Assessing potential exemplars in reducing zero-dose children: a novel approach for identifying positive outliers in decreasing national levels and geographic inequalities in unvaccinated children**

**Supplementary Table S1. Initial countries considered for the present analysis but were excluded for not meeting inclusion criteria.** \*Gavi-supported indicates that the country received Gavi support as of 2018 or had a dedicated country hub page. \*\*Countries with national and subnational DTP1 estimates (for both first and second administrative units) as modelled by the Institute for Health Metrics and Evaluation. Table 1 lists the 56 countries included in the present analysis.

| Reason for exclusion                                                                                  | Country                | World Bank FY20 income group | Gavi-supported* | National and subnational DTP1 estimates available, 2000-2019** | Gavi zero-dose segmentation grouping |
|-------------------------------------------------------------------------------------------------------|------------------------|------------------------------|-----------------|----------------------------------------------------------------|--------------------------------------|
| Excluded due to post-transition MIC status or omission from Gavi zero-dose segmentation groups (n=13) | Armenia                | Upper-middle income          | Yes             | Yes                                                            | Post-transition MIC                  |
|                                                                                                       | Azerbaijan             | Upper-middle income          | Yes             | Yes                                                            | Post-transition MIC                  |
|                                                                                                       | Bolivia                | Lower-middle income          | Yes             | Yes                                                            | Post-transition MIC                  |
|                                                                                                       | Cuba                   | Upper-middle income          | Yes             | Yes                                                            | Post-transition MIC                  |
|                                                                                                       | Guyana                 | Upper-middle income          | Yes             | Yes                                                            | Post-transition MIC                  |
|                                                                                                       | Honduras               | Lower-middle income          | Yes             | Yes                                                            | Post-transition MIC                  |
|                                                                                                       | Indonesia              | Lower-middle income          | Yes             | Yes                                                            | Post-transition MIC                  |
|                                                                                                       | Moldova                | Lower-middle income          | Yes             | Yes                                                            | Post-transition MIC                  |
|                                                                                                       | Mongolia               | Lower-middle income          | Yes             | Yes                                                            | Post-transition MIC                  |
|                                                                                                       | Nicaragua              | Lower-middle income          | Yes             | Yes                                                            | Post-transition MIC                  |
|                                                                                                       | Sri Lanka              | Upper-middle income          | Yes             | Yes                                                            | Post-transition MIC                  |
|                                                                                                       | Turkmenistan           | Upper-middle income          | Yes             | Yes                                                            | Omitted                              |
|                                                                                                       | Ukraine                | Lower-middle income          | Yes             | Yes                                                            | Omitted                              |
| Excluded due to lack of subnational DTP1 estimates for 2000-2019 (n=19)                               | Albania                | Upper-middle income          | Yes             | No                                                             |                                      |
|                                                                                                       | Bhutan                 | Lower-middle income          | Yes             | No                                                             |                                      |
|                                                                                                       | Bosnia and Herzegovina | Upper-middle income          | Yes             | No                                                             |                                      |
|                                                                                                       | Cabo Verde             | Lower-middle income          | No              | No                                                             |                                      |
|                                                                                                       | China                  | Upper-middle income          | Yes             | No                                                             |                                      |
|                                                                                                       | Egypt                  | Lower-middle income          | No              | No                                                             |                                      |
|                                                                                                       | El Salvador            | Lower-middle income          | No              | No                                                             |                                      |
|                                                                                                       | Eswatini               | Lower-middle income          | No              | No                                                             |                                      |
|                                                                                                       | Georgia                | Upper-middle income          | Yes             | No                                                             |                                      |
|                                                                                                       | Kiribati               | Lower-middle income          | Yes             | No                                                             |                                      |
|                                                                                                       | Micronesia             | Lower-middle income          | No              | No                                                             |                                      |
|                                                                                                       | Morocco                | Lower-middle income          | No              | No                                                             |                                      |
|                                                                                                       | North Korea            | Low-income                   | Yes             | No                                                             |                                      |
|                                                                                                       | Palestine              | Lower-middle income          | No              | No                                                             |                                      |
|                                                                                                       | Philippines            | Lower-middle income          | No              | No                                                             |                                      |

| Reason for exclusion                                                                                                 | Country            | World Bank FY20 income group | Gavi-supported* | National and subnational DTP1 estimates available, 2000-2019** | Gavi zero-dose segmentation grouping |
|----------------------------------------------------------------------------------------------------------------------|--------------------|------------------------------|-----------------|----------------------------------------------------------------|--------------------------------------|
|                                                                                                                      | Solomon Islands    | Lower-middle income          | Yes             | No                                                             |                                      |
|                                                                                                                      | Syria              | Low-income                   | No              | No                                                             |                                      |
|                                                                                                                      | Tunisia            | Lower-middle income          | No              | No                                                             |                                      |
|                                                                                                                      | Vanuatu            | Lower-middle income          | No              | No                                                             |                                      |
| Excluded due to being classified as upper-middle income by World Bank for FY20 <i>and</i> not Gavi-supported* (n=47) | Algeria            | Upper-middle income          | No              | No                                                             |                                      |
|                                                                                                                      | American Samoa     | Upper-middle income          | No              | No                                                             |                                      |
|                                                                                                                      | Argentina          | Upper-middle income          | No              | No                                                             |                                      |
|                                                                                                                      | Belarus            | Upper-middle income          | No              | No                                                             |                                      |
|                                                                                                                      | Belize             | Upper-middle income          | No              | No                                                             |                                      |
|                                                                                                                      | Botswana           | Upper-middle income          | No              | No                                                             |                                      |
|                                                                                                                      | Brazil             | Upper-middle income          | No              | No                                                             |                                      |
|                                                                                                                      | Bulgaria           | Upper-middle income          | No              | No                                                             |                                      |
|                                                                                                                      | Colombia           | Upper-middle income          | No              | No                                                             |                                      |
|                                                                                                                      | Costa Rica         | Upper-middle income          | No              | No                                                             |                                      |
|                                                                                                                      | Dominica           | Upper-middle income          | No              | No                                                             |                                      |
|                                                                                                                      | Dominican Republic | Upper-middle income          | No              | No                                                             |                                      |
|                                                                                                                      | Ecuador            | Upper-middle income          | No              | No                                                             |                                      |
|                                                                                                                      | Equatorial Guinea  | Upper-middle income          | No              | No                                                             |                                      |
|                                                                                                                      | Fiji               | Upper-middle income          | No              | No                                                             |                                      |
|                                                                                                                      | Gabon              | Upper-middle income          | No              | No                                                             |                                      |
|                                                                                                                      | Grenada            | Upper-middle income          | No              | No                                                             |                                      |
|                                                                                                                      | Guatemala          | Upper-middle income          | No              | No                                                             |                                      |
|                                                                                                                      | Iran               | Upper-middle income          | No              | No                                                             |                                      |
|                                                                                                                      | Iraq               | Upper-middle income          | No              | No                                                             |                                      |
|                                                                                                                      | Jamaica            | Upper-middle income          | No              | No                                                             |                                      |
|                                                                                                                      | Jordan             | Upper-middle income          | No              | No                                                             |                                      |
|                                                                                                                      | Kazakhstan         | Upper-middle income          | No              | No                                                             |                                      |
|                                                                                                                      | Lebanon            | Upper-middle income          | No              | No                                                             |                                      |
|                                                                                                                      | Libya              | Upper-middle income          | No              | No                                                             |                                      |
|                                                                                                                      | Malaysia           | Upper-middle income          | No              | No                                                             |                                      |
|                                                                                                                      | Maldives           | Upper-middle income          | No              | No                                                             |                                      |
|                                                                                                                      | Marshall Islands   | Upper-middle income          | No              | No                                                             |                                      |
|                                                                                                                      | Mauritius          | Upper-middle income          | No              | No                                                             |                                      |
|                                                                                                                      | Mexico             | Upper-middle income          | No              | No                                                             |                                      |
|                                                                                                                      | Montenegro         | Upper-middle income          | No              | No                                                             |                                      |
|                                                                                                                      | Namibia            | Upper-middle income          | No              | No                                                             |                                      |
|                                                                                                                      | North Macedonia    | Upper-middle income          | No              | No                                                             |                                      |
|                                                                                                                      | Paraguay           | Upper-middle income          | No              | No                                                             |                                      |
|                                                                                                                      | Peru               | Upper-middle income          | No              | No                                                             |                                      |
|                                                                                                                      | Romania            | Upper-middle income          | No              | No                                                             |                                      |

| Reason for exclusion | Country                          | World Bank FY20 income group | Gavi-supported* | National and subnational DTP1 estimates available, 2000-2019** | Gavi zero-dose segmentation grouping |
|----------------------|----------------------------------|------------------------------|-----------------|----------------------------------------------------------------|--------------------------------------|
|                      | Russia                           | Upper-middle income          | No              | No                                                             |                                      |
|                      | Saint Lucia                      | Upper-middle income          | No              | No                                                             |                                      |
|                      | Saint Vincent and the Grenadines | Upper-middle income          | No              | No                                                             |                                      |
|                      | Samoa                            | Upper-middle income          | No              | No                                                             |                                      |
|                      | Serbia                           | Upper-middle income          | No              | No                                                             |                                      |
|                      | South Africa                     | Upper-middle income          | No              | No                                                             |                                      |
|                      | Suriname                         | Upper-middle income          | No              | No                                                             |                                      |
|                      | Thailand                         | Upper-middle income          | No              | No                                                             |                                      |
|                      | Tonga                            | Upper-middle income          | No              | No                                                             |                                      |
|                      | Turkey                           | Upper-middle income          | No              | No                                                             |                                      |
|                      | Venezuela                        | Upper-middle income          | No              | No                                                             |                                      |

**Supplementary Figure S1. National and subnational trends in the prevalence of no-DTP children, 2000-2019, in the Democratic Republic of the Congo (A), Ethiopia (B) India (C) Bangladesh (D) and Burundi (E)** Darker shaded and larger circles represent the national estimate of no-DTP prevalence for a given country, while the lighter shaded and smaller circles represent estimates of no-DTP prevalence for second-level administrative unit for a given country. All estimates were provided by the Institute for Health Metrics and Evaluation.

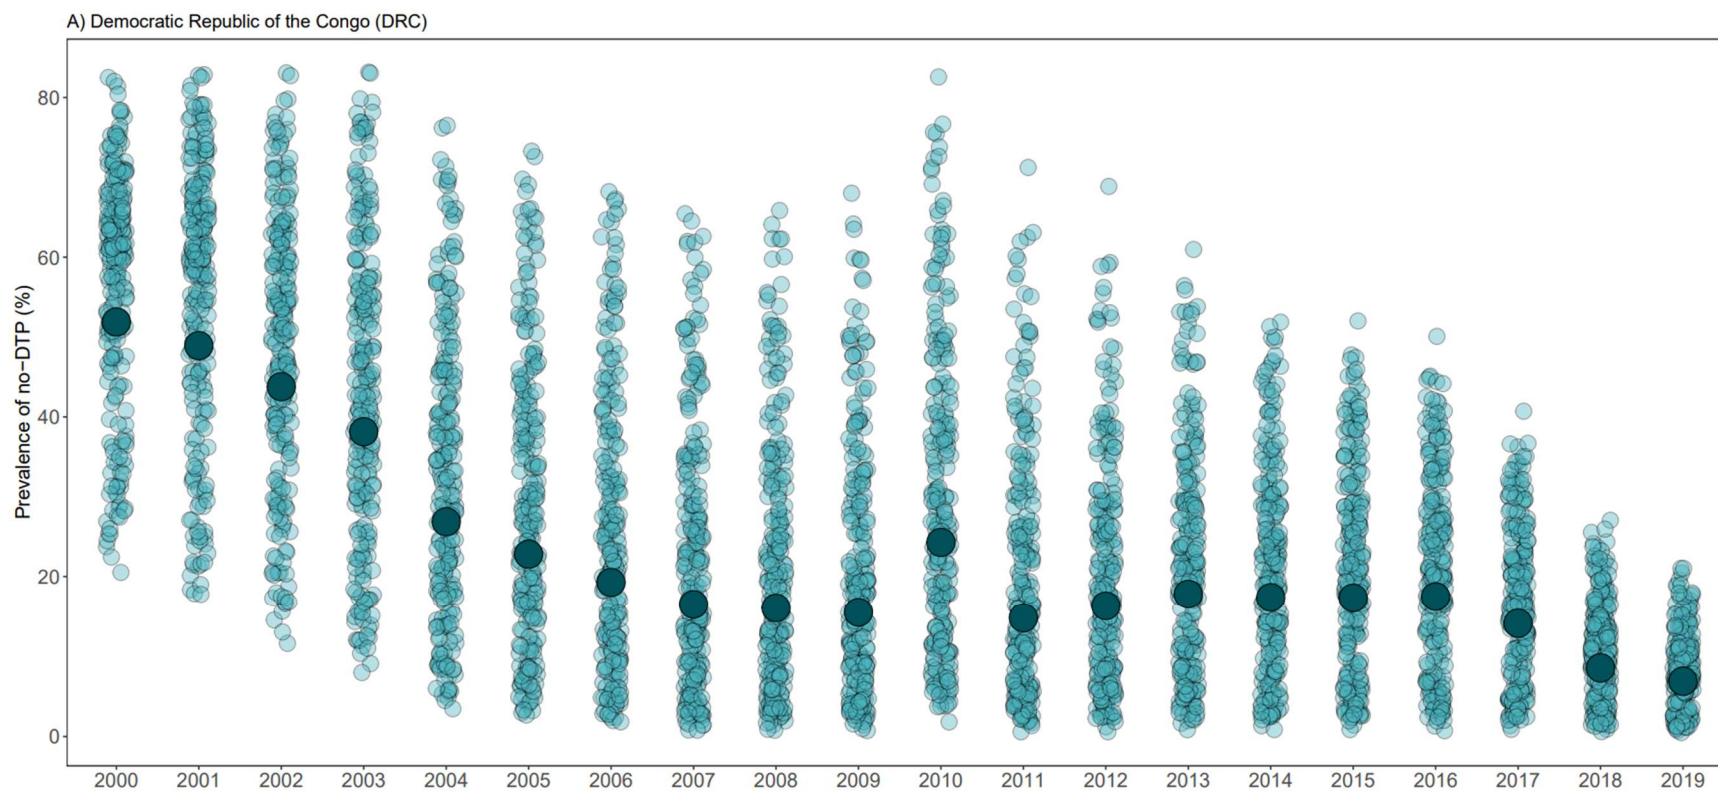

B) Ethiopia

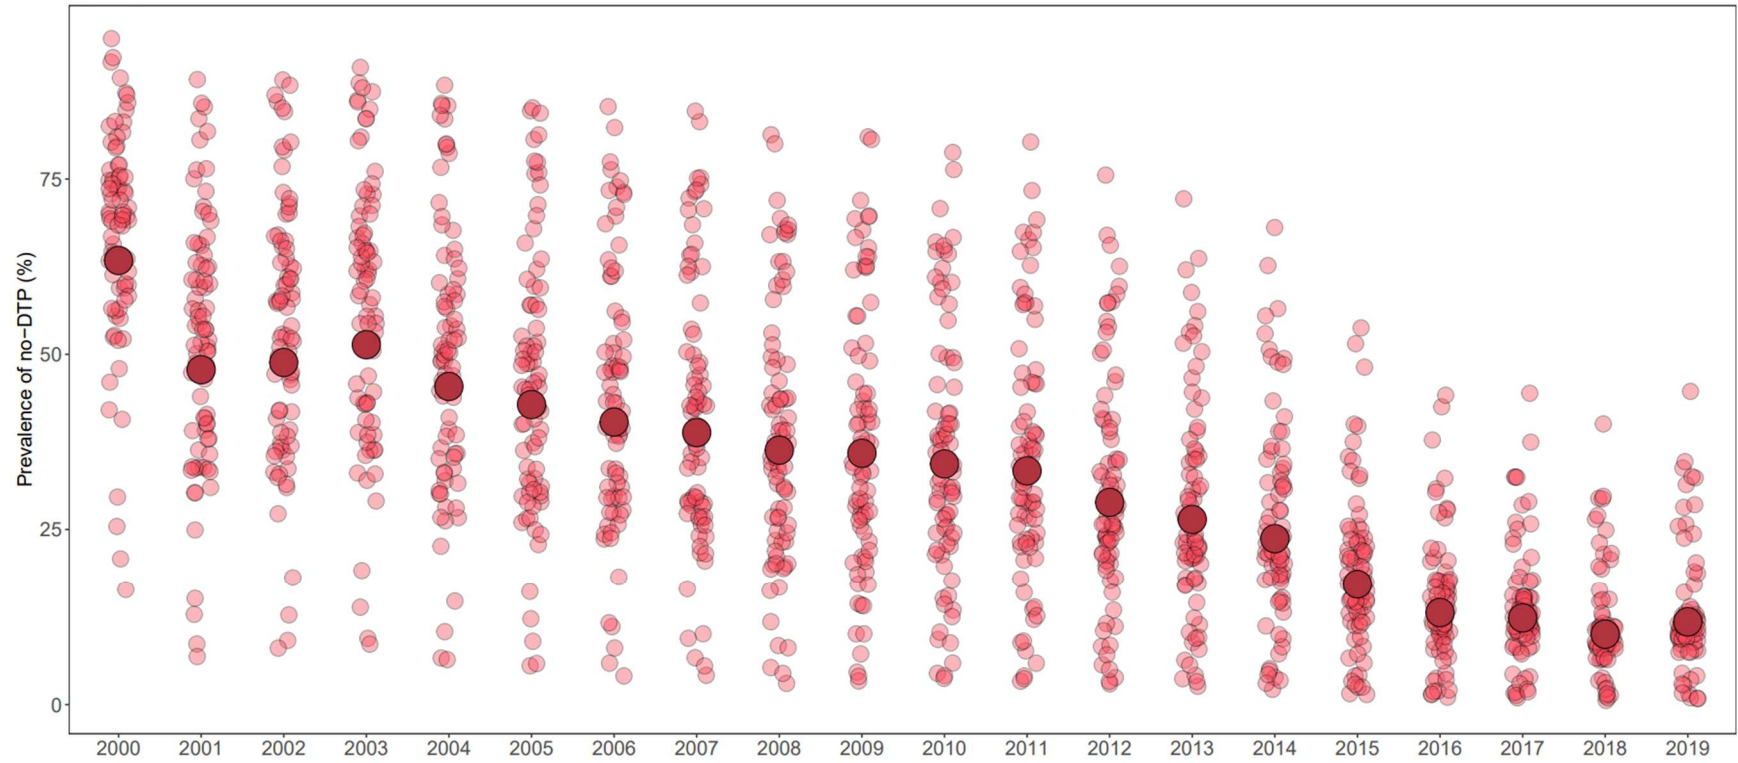

C) India

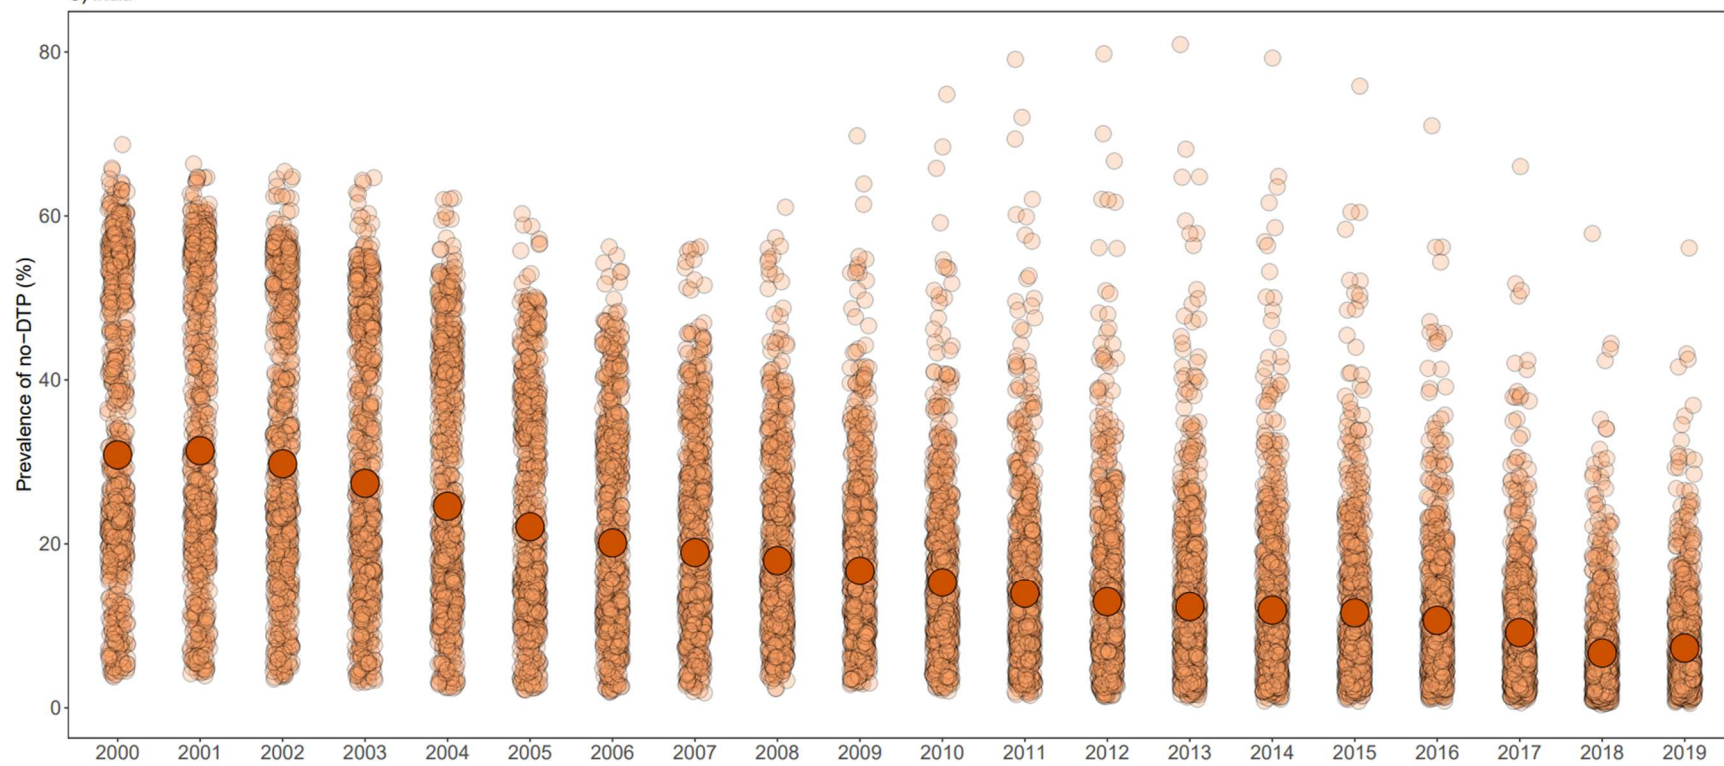

D) Bangladesh

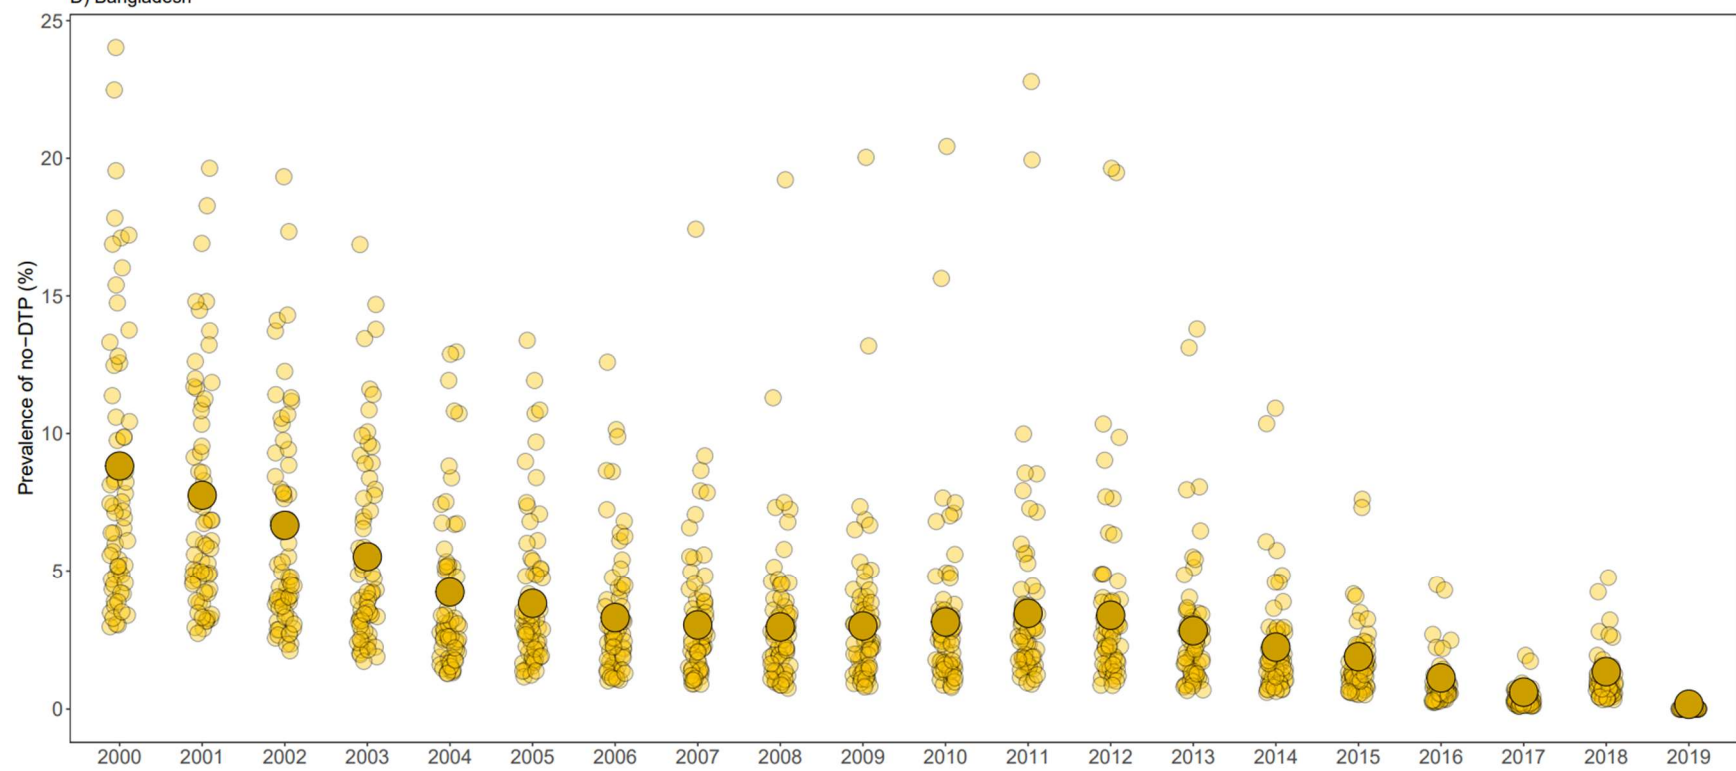

E) Burundi

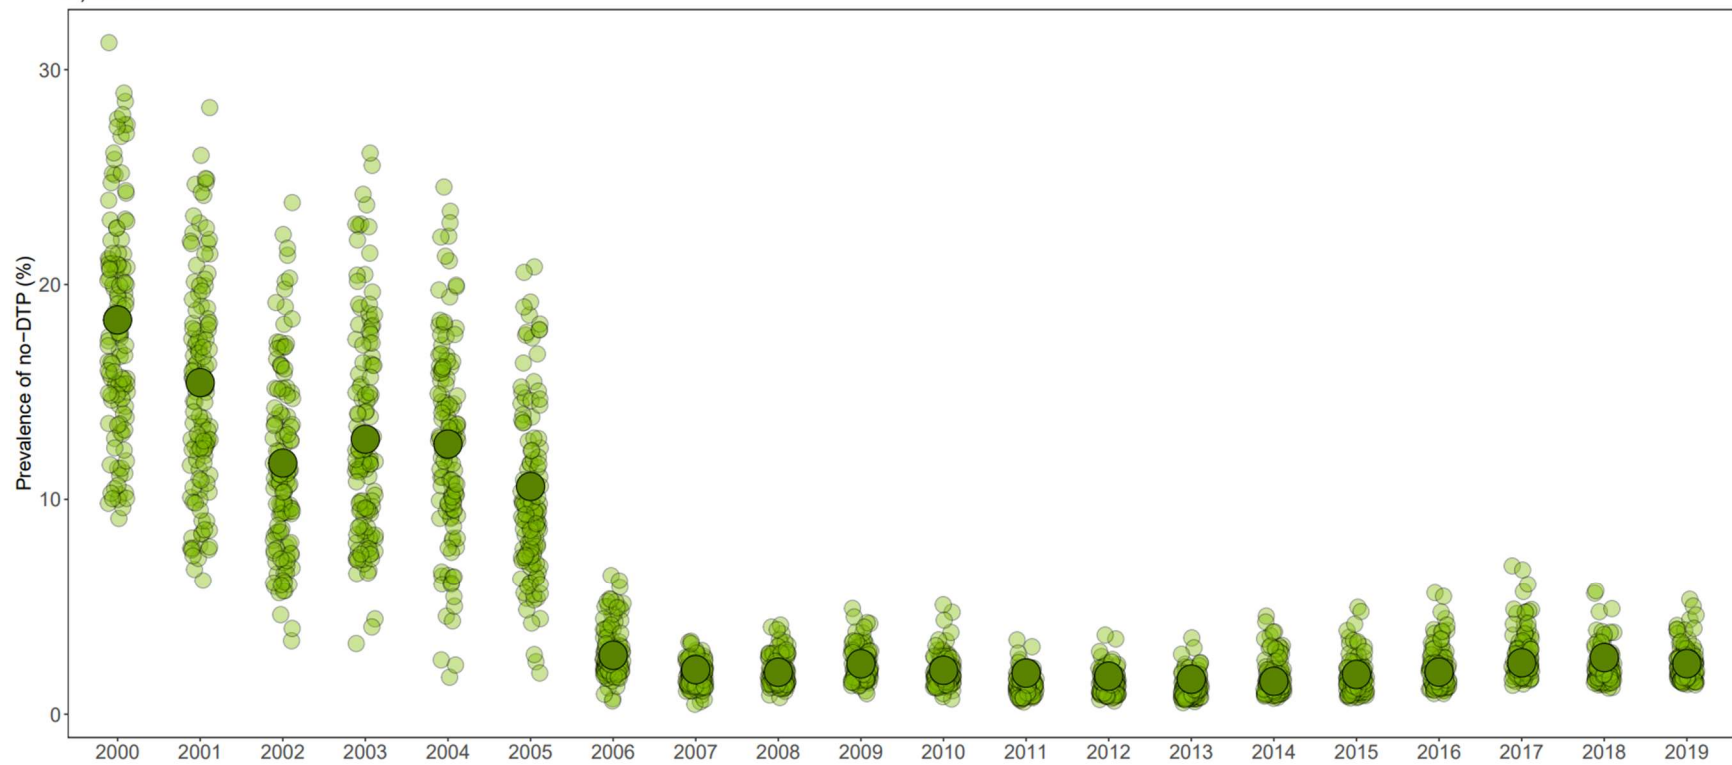



**Supplementary Figure S2. Subnational no-DTP prevalence in Nigeria (A) and Ethiopia (B), 2000-2019.** Select trends for first-level administrative units are color-coded in shades of maroon, teal, green, and yellow while zone-level trends are light gray in color. All estimates were provided by the Institute for Health Metrics and Evaluation.

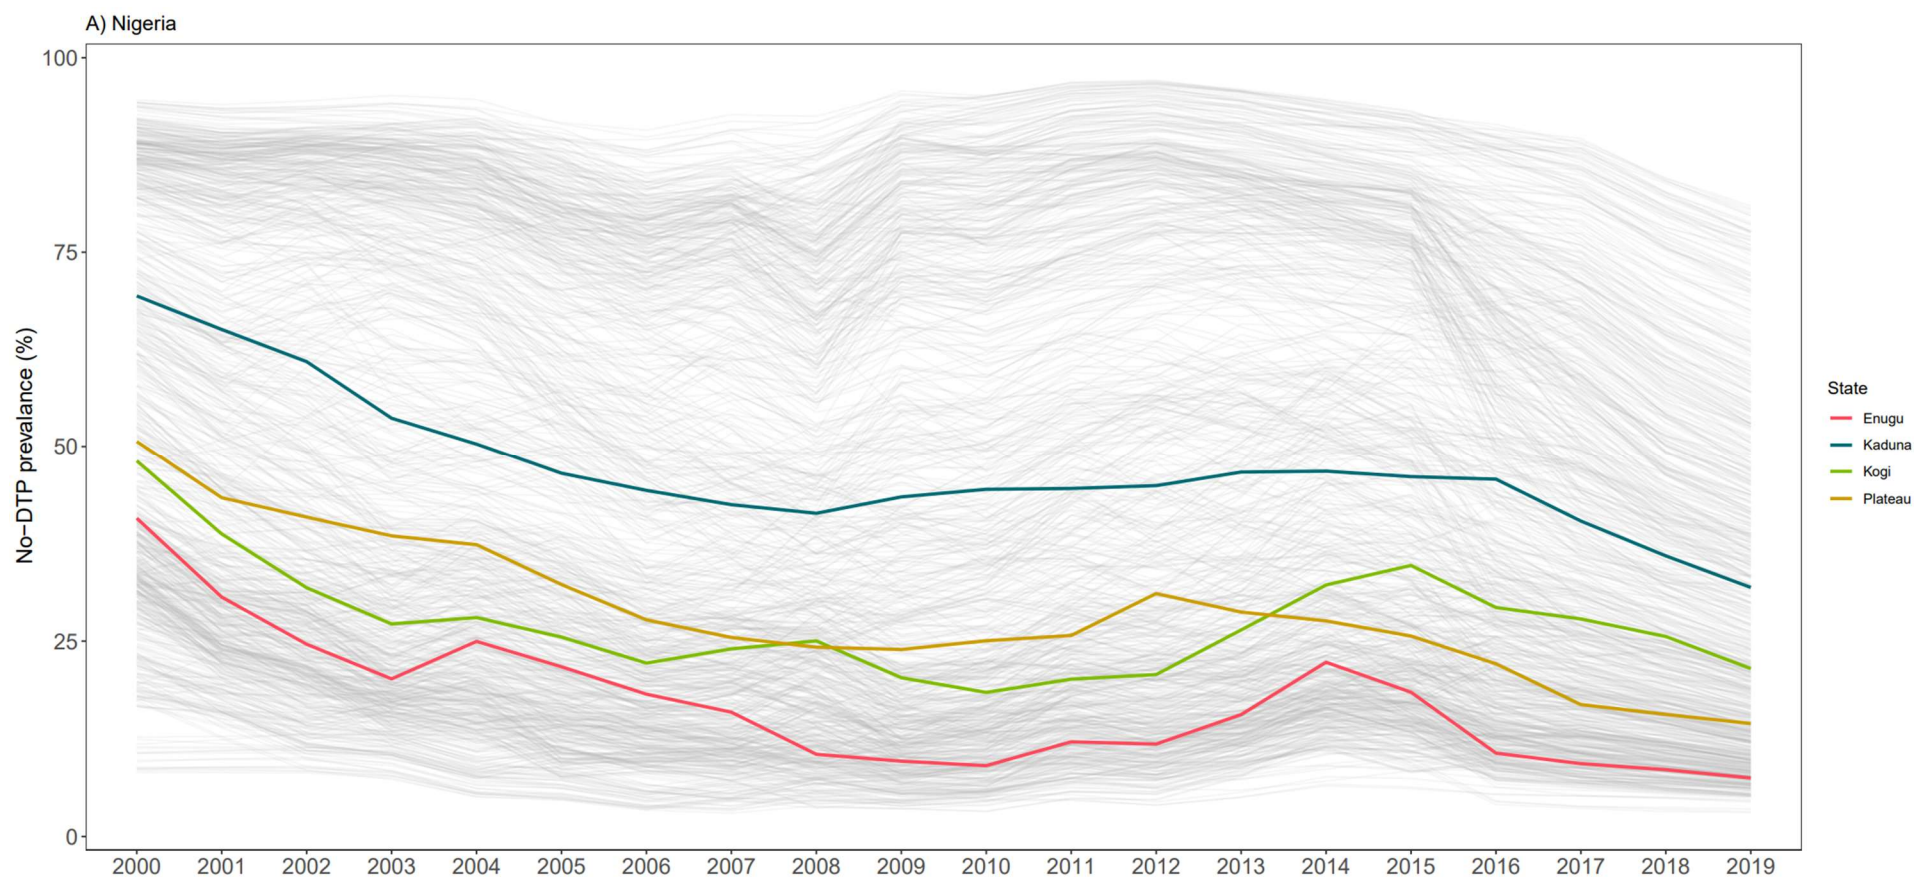

B) Ethiopia

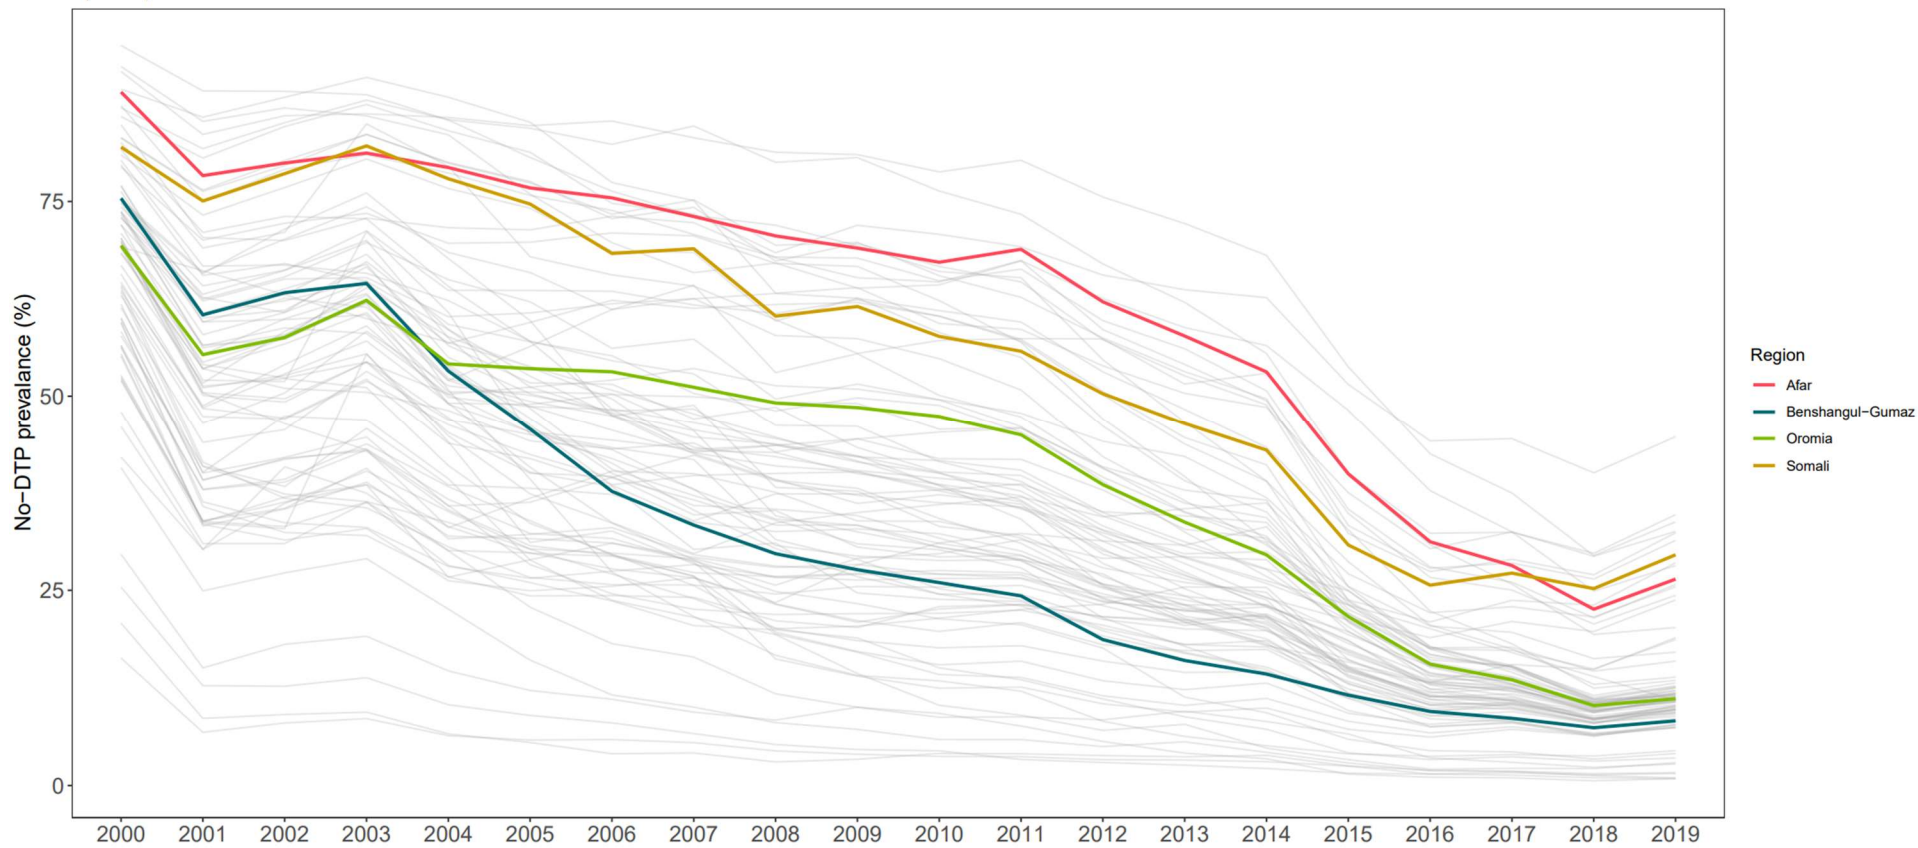

Supplement: s1 [file s1]
